# Supplementary material
Source: PubMed Central journal article supplement (PMC3629774)
Supplement: EC.00321-12_zek999094067so1.pdf [file EC.00321-12_zek999094067so1.pdf]

TABLE S1. Up- or down-regulated genes in non-sexual and sexual flocculation cells compared to non-flocculation cells

| Gene Name                 | Annotation <sup>a</sup>       | WT       |          | rpl32-1Δ                 |         | rpl32-2Δ |                          |         | Haploid cells mixtures in YEPD |          | Diploid cells            |         |
|---------------------------|-------------------------------|----------|----------|--------------------------|---------|----------|--------------------------|---------|--------------------------------|----------|--------------------------|---------|
|                           |                               | Mean     | Mean     | Fold Change <sup>b</sup> | P Value | Mean     | Fold Change <sup>b</sup> | P Value | Mean                           | Mean     | Fold Change <sup>b</sup> | P Value |
| <b>ribosomal proteins</b> |                               |          |          |                          |         |          |                          |         |                                |          |                          |         |
| rps1401 <sup>c</sup>      | 40S ribosomal protein S14     | 5633.44  | 1248.06  | <b>-4.52</b>             | 0.036   | 1326.02  | <b>-4.25</b>             | 0.015   | 6315.58                        | 2689.44  | <b>-2.35</b>             | 0.026   |
| rpl1603                   | 60S ribosomal protein L13/L16 | 3300.57  | 2580.24  | <b>-1.28</b>             | 0.033   | 2634.41  | <b>-1.25</b>             | 0.034   | 3585.11                        | 2675.73  | <b>-1.34</b>             | 0.026   |
| rpl1002                   | 60S ribosomal protein L10     | 17886.71 | 14802.71 | <b>-1.21</b>             | 0.034   | 14795.97 | <b>-1.21</b>             | 0.011   | 16627.69                       | 12594.82 | <b>-1.31</b>             | 0.040   |
| rpl3002 <sup>c</sup>      | 60S ribosomal protein L30     | 4617.83  | 3830.89  | <b>-1.21</b>             | 0.022   | 3837.77  | <b>-1.20</b>             | 0.043   | 5565.13                        | 4215.37  | <b>-1.32</b>             | 0.017   |
| rpl3201 <sup>c</sup>      | 60S ribosomal protein L32     | 15052.34 | 18.00    | <b>-836.11</b>           | 0.017   | 30959.65 | <b>2.06</b>              | 0.018   | 14405.18                       | 9593.92  | <b>-1.50</b>             | 0.011   |
| rps2401                   | 40S ribosomal protein S24     | 14735.41 | 12052.33 | <b>-1.22</b>             | 0.041   | 14409.47 | -1.02                    | 0.011   | 14220.65                       | 11075.36 | <b>-1.28</b>             | 0.045   |
| rpl3202                   | 60S ribosomal protein L32     | 17587.95 | 36239.27 | <b>2.06</b>              | 0.027   | 152.37   | <b>-115.42</b>           | 0.020   | 16567.86                       | 11080.26 | <b>-1.50</b>             | 0.030   |
| rpl101                    | 60S ribosomal protein L10a    | 18816.36 | 18969.15 | 1.01                     | 0.026   | 18969.15 | 1.01                     | 0.030   | 18094.96                       | 11784.33 | <b>-1.54</b>             | 0.042   |
| rps1001 <sup>c</sup>      | 40S ribosomal protein S10     | 10861.23 | 12052.49 | 1.11                     | 0.041   | 11542.01 | 1.06                     | 0.014   | 11121.78                       | 7372.40  | <b>-1.51</b>             | 0.009   |

|                                      |                                                    |          |          |              |       |          |              |       |          |          |              |       |
|--------------------------------------|----------------------------------------------------|----------|----------|--------------|-------|----------|--------------|-------|----------|----------|--------------|-------|
| rps1002 <sup>c</sup>                 | 40S ribosomal protein<br>S10                       | 14556.74 | 15476.00 | 1.06         | 0.032 | 15157.35 | 1.04         | 0.011 | 14060.89 | 9911.73  | <b>-1.42</b> | 0.011 |
| rps2201                              | 40S ribosomal protein<br>S15a                      | 14333.47 | 15542.50 | 1.08         | 0.032 | 14871.41 | 1.04         | 0.011 | 13948.28 | 11190.53 | <b>-1.25</b> | 0.045 |
| rpl703                               | 60S ribosomal protein<br>L7                        | 2739.70  | 6017.69  | <b>2.20</b>  | 0.014 | 5063.29  | <b>1.85</b>  | 0.032 | 2920.91  | 2377.35  | <b>-1.23</b> | 0.029 |
| rps3001                              | 40S ribosomal protein<br>S30                       | 13630.96 | 14623.43 | 1.07         | 0.036 | 14222.28 | 1.04         | 0.012 | 12263.64 | 9984.89  | <b>-1.23</b> | 0.011 |
| rps1701                              | 40S ribosomal protein<br>S17                       | 15215.98 | 16107.03 | 1.06         | 0.031 | 16565.03 | 1.09         | 0.034 | 14777.35 | 12035.24 | <b>-1.23</b> | 0.042 |
| rps2601                              | 40S ribosomal protein<br>S26                       | 13941.52 | 15681.42 | 1.12         | 0.032 | 15571.84 | 1.12         | 0.011 | 12662.72 | 10313.09 | <b>-1.23</b> | 0.011 |
| rps002                               | 40S ribosomal protein<br>SOB                       | 16414.69 | 16414.69 | 1.00         | 0.030 | 16414.69 | 1.00         | 0.034 | 15292.11 | 12486.72 | <b>-1.22</b> | 0.040 |
| rps1901                              | 40S ribosomal protein<br>S19                       | 19155.88 | 19207.22 | 1.00         | 0.026 | 19155.88 | 1.00         | 0.029 | 18104.99 | 14801.21 | <b>-1.22</b> | 0.034 |
| rps401                               | 40S ribosomal protein<br>S4                        | 13976.35 | 13976.35 | 1.00         | 0.036 | 13976.35 | 1.00         | 0.011 | 13624.35 | 11224.91 | <b>-1.21</b> | 0.045 |
| rpl1801                              | 60S ribosomal protein<br>L18                       | 14692.58 | 15140.85 | 1.03         | 0.033 | 15045.05 | 1.02         | 0.011 | 14273.98 | 11817.19 | <b>-1.21</b> | 0.042 |
| rpl3001 <sup>c</sup>                 | 60S ribosomal protein<br>L30                       | 17511.32 | 18269.91 | 1.04         | 0.027 | 17742.12 | 1.01         | 0.032 | 16679.63 | 12456.60 | <b>-1.34</b> | 0.040 |
| <b>ribosomal biogenesis proteins</b> |                                                    |          |          |              |       |          |              |       |          |          |              |       |
| urb2 <sup>c</sup>                    | ribosome biogenesis<br>protein Urb2<br>(predicted) | 949.35   | 743.77   | <b>-1.28</b> | 0.013 | 759.67   | <b>-1.25</b> | 0.026 | 997.52   | 766.36   | <b>-1.30</b> | 0.033 |
| SPBP16F5.06                          | ribosome biogenesis<br>protein Nop6                | 692.14   | 552.76   | <b>-1.25</b> | 0.018 | 511.85   | <b>-1.35</b> | 0.039 | 305.91   | 199.86   | <b>-1.53</b> | 0.030 |

|              |                                                    |          |          |             |       |          |       |       |         |         |              |       |
|--------------|----------------------------------------------------|----------|----------|-------------|-------|----------|-------|-------|---------|---------|--------------|-------|
| SPAC890.05   | ribosome biogenesis<br>protein (predicted)         | 1984.28  | 1705.68  | -1.16       | 0.050 | 1912.93  | -1.04 | 0.046 | 739.57  | 376.74  | <b>-1.96</b> | 0.016 |
| SPAC1952.02  | ribosome biogenesis<br>protein (predicted)         | 795.50   | 767.77   | -1.04       | 0.013 | 830.70   | 1.04  | 0.024 | 550.99  | 380.96  | <b>-1.45</b> | 0.016 |
| brx1         | ribosome biogenesis<br>protein Brx1                | 4530.33  | 5137.57  | 1.13        | 0.017 | 5062.42  | 1.12  | 0.032 | 1661.42 | 1264.63 | <b>-1.31</b> | 0.020 |
| SPAC3F10.17  | ribosome biogenesis<br>protein Ltv1 (predicted)    | 3782.44  | 3822.04  | 1.01        | 0.022 | 3835.39  | 1.01  | 0.043 | 680.65  | 527.71  | <b>-1.29</b> | 0.047 |
| SPAC1486.09  | ribosome biogenesis<br>protein Nob1<br>(predicted) | 4274.68  | 4374.11  | 1.02        | 0.034 | 4182.13  | -1.02 | 0.039 | 816.10  | 540.52  | <b>-1.51</b> | 0.046 |
| SPAC4F10.09c | ribosome biogenesis<br>protein Noc1<br>(predicted) | 2001.83  | 1963.71  | -1.02       | 0.044 | 1732.39  | -1.16 | 0.033 | 768.91  | 544.89  | <b>-1.41</b> | 0.046 |
| SPBC83.15    | ribosome biogenesis<br>protein Nsa1                | 1474.80  | 1577.87  | 1.07        | 0.028 | 1541.46  | 1.04  | 0.029 | 390.84  | 307.90  | <b>-1.27</b> | 0.019 |
| SPCP1E11.08  | ribosome biogenesis<br>protein Nsa2<br>(predicted) | 10258.98 | 12704.83 | <b>1.24</b> | 0.020 | 11230.71 | 1.09  | 0.031 | 1928.82 | 1586.63 | <b>-1.22</b> | 0.016 |
| SPCC4G3.18   | ribosome biogenesis<br>protein Rix1 (predicted)    | 1298.11  | 1261.07  | -1.03       | 0.036 | 1258.13  | -1.03 | 0.016 | 772.62  | 604.75  | <b>-1.28</b> | 0.041 |
| SPAPB8E5.07c | ribosome biogenesis<br>protein Rrp12               | 1721.44  | 1724.28  | 1.00        | 0.049 | 1711.17  | 1.00  | 0.026 | 571.62  | 467.30  | <b>-1.22</b> | 0.013 |
| SPBC947.07   | ribosome biogenesis<br>protein Rrp14-C             | 669.62   | 609.37   | -1.10       | 0.016 | 669.62   | 1.00  | 0.030 | 250.67  | 199.59  | <b>-1.26</b> | 0.030 |
| rrs1         | ribosome biogenesis<br>protein Rrs1 (predicted)    | 1426.83  | 1659.62  | 1.16        | 0.052 | 1619.73  | 1.14  | 0.028 | 643.13  | 454.87  | <b>-1.41</b> | 0.013 |
| SPAC23H4.15  | ribosome biogenesis<br>protein Tsr1 (predicted)    | 2057.68  | 2192.25  | 1.07        | 0.039 | 2214.59  | 1.08  | 0.040 | 1091.81 | 796.05  | <b>-1.37</b> | 0.031 |

|                                                            |                                                                                          |         |         |              |       |         |              |       |         |         |              |       |
|------------------------------------------------------------|------------------------------------------------------------------------------------------|---------|---------|--------------|-------|---------|--------------|-------|---------|---------|--------------|-------|
| SPCC14G10.02                                               | ribosome biogenesis protein Urb1                                                         | 841.91  | 981.51  | 1.17         | 0.046 | 871.25  | 1.03         | 0.023 | 441.51  | 330.81  | <b>-1.33</b> | 0.018 |
| nop16                                                      | ribosome biogenesis protein Nop16 (predicted)                                            | 2373.50 | 2420.21 | 1.02         | 0.036 | 2385.87 | 1.01         | 0.037 | 441.10  | 177.15  | <b>-2.49</b> | 0.034 |
| <b>ribosome synthesis-regulating transcription factors</b> |                                                                                          |         |         |              |       |         |              |       |         |         |              |       |
| SFP1 <sup>c</sup>                                          | Transcription factor that controls expression of ribosome biogenesis genes in repression | 9.11    | 9.11    | 1.00         | 0.011 | 9.11    | 1.00         | 0.022 | 11.49   | 13.97   | <b>1.22</b>  | 0.021 |
| CRF1                                                       | Transcriptional co-repressor involved in repression of ribosomal protein (RP) gene       | 7.93    | 7.93    | 1.00         | 0.013 | 7.93    | 1.00         | 0.025 | 10.46   | 12.60   | <b>1.21</b>  | 0.024 |
| <b>Pheromone response pathway (MAPK signal pathway)</b>    |                                                                                          |         |         |              |       |         |              |       |         |         |              |       |
| STE11 <sup>c</sup>                                         | Signal transducing MEK kinase involved in pheromone response                             | 15.14   | 26.85   | <b>1.77</b>  | 0.019 | 26.01   | <b>1.72</b>  | 0.038 | 171.39  | 20.36   | <b>8.41</b>  | 0.035 |
| pmk1 <sup>c</sup>                                          | MAP kinase Pmk1                                                                          | 1001.53 | 1233.16 | <b>1.23</b>  | 0.036 | 1064.71 | <b>1.26</b>  | 0.019 | 1269.90 | 1788.71 | <b>1.41</b>  | 0.014 |
| cmk2                                                       | MAPK-activated protein kinase Cmk2                                                       | 245.11  | 426.14  | <b>1.74</b>  | 0.012 | 329.03  | <b>1.34</b>  | 0.024 | 268.40  | 379.48  | <b>1.41</b>  | 0.016 |
| byr1                                                       | MAP kinase kinase Byr1                                                                   | 2198.95 | 2772.39 | <b>1.26</b>  | 0.031 | 3110.40 | <b>1.41</b>  | 0.029 | 2364.80 | 3050.59 | <b>1.29</b>  | 0.023 |
| srk1                                                       | MAPK-activated protein kinase Srk1                                                       | 1332.67 | 824.57  | <b>-1.62</b> | 0.012 | 817.19  | <b>-1.63</b> | 0.024 | 1497.67 | 4191.64 | <b>2.80</b>  | 0.017 |
| STE12                                                      | Transcription factor that is activated by a MAP kinase signaling cascade                 | 28.89   | 29.72   | 1.03         | 0.017 | 29.72   | 1.03         | 0.034 | 40.36   | 53.18   | <b>1.32</b>  | 0.027 |

|                            |                                                      |         |        |              |       |         |              |       |         |         |              |       |
|----------------------------|------------------------------------------------------|---------|--------|--------------|-------|---------|--------------|-------|---------|---------|--------------|-------|
| sin1                       | stress activated MAP kinase interacting protein Sin1 | 894.37  | 651.98 | <b>-1.37</b> | 0.015 | 685.41  | <b>-1.30</b> | 0.029 | 976.55  | 1185.04 | <b>1.21</b>  | 0.021 |
| pka1 <sup>c</sup>          | cAMP-dependent protein kinase catalytic subunit Pka1 | 2378.11 | 976.17 | <b>-2.44</b> | 0.046 | 1110.66 | <b>-2.14</b> | 0.018 | 4026.47 | 3056.57 | <b>-1.24</b> | 0.023 |
| <b>Sexual reproduction</b> |                                                      |         |        |              |       |         |              |       |         |         |              |       |
| mug57 <sup>c</sup>         | meiotically upregulated gene Mug57                   | 102.77  | 200.03 | <b>1.95</b>  | 0.012 | 202.70  | <b>1.97</b>  | 0.040 | 177.45  | 288.68  | <b>1.63</b>  | 0.021 |
| mug97                      | meiotically upregulated gene Mug97                   | 34.19   | 59.33  | <b>1.73</b>  | 0.019 | 72.82   | <b>2.13</b>  | 0.041 | 45.17   | 65.89   | <b>1.46</b>  | 0.024 |
| mei4                       | meiotic forkhead transcription factor Mei4           | 46.01   | 59.61  | <b>1.30</b>  | 0.009 | 80.37   | <b>1.75</b>  | 0.037 | 69.59   | 104.19  | <b>1.50</b>  | 0.015 |
| SPCC1442.04c               | meiotic recombination protein (predicted)            | 116.70  | 127.57 | <b>1.29</b>  | 0.020 | 152.69  | <b>1.31</b>  | 0.020 | 122.67  | 204.18  | <b>1.66</b>  | 0.029 |
| SPAC11D3.03c               | meiotic chromosome segregation protein               | 83.70   | 246.14 | <b>2.94</b>  | 0.010 | 281.44  | <b>3.36</b>  | 0.028 | 95.17   | 65.60   | <b>-1.45</b> | 0.024 |
| rec15                      | meiotic recombination protein Rec15                  | 15.13   | 24.02  | <b>1.59</b>  | 0.021 | 27.87   | <b>1.84</b>  | 0.036 | 20.72   | 17.52   | <b>-1.18</b> | 0.040 |
| mug146                     | meiotically upregulated gene Mug46                   | 102.70  | 133.03 | <b>1.30</b>  | 0.019 | 153.47  | <b>1.49</b>  | 0.020 | 129.40  | 109.27  | <b>-1.18</b> | 0.015 |
| mug5                       | meiotically upregulated gene Mug5                    | 30.17   | 51.37  | <b>1.70</b>  | 0.010 | 49.18   | <b>1.63</b>  | 0.020 | 19.85   | 14.63   | <b>-1.36</b> | 0.021 |
| tht2                       | meiotically upregulated gene Mug22                   | 28.44   | 41.34  | <b>1.45</b>  | 0.012 | 40.84   | <b>1.45</b>  | 0.034 | 30.65   | 21.01   | <b>-1.46</b> | 0.033 |
| rec8                       | meiotic cohesin complex subunit Rec8                 | 33.54   | 33.54  | 1.00         | 0.015 | 33.54   | 1.00         | 0.030 | 49.66   | 71.05   | <b>1.43</b>  | 0.023 |

|                                        |                                                                           |        |        |              |       |        |              |       |        |        |             |       |
|----------------------------------------|---------------------------------------------------------------------------|--------|--------|--------------|-------|--------|--------------|-------|--------|--------|-------------|-------|
| rec10                                  | meiotic recombination protein Rec10                                       | 112.85 | 67.03  | <b>-1.68</b> | 0.016 | 80.12  | <b>-1.41</b> | 0.037 | 131.28 | 164.18 | <b>1.25</b> | 0.037 |
| rec25                                  | meiotic recombination protein Rec25                                       | 46.27  | 51.37  | 1.11         | 0.010 | 51.37  | 1.11         | 0.019 | 56.53  | 72.65  | <b>1.29</b> | 0.022 |
| mug184                                 | meiotically upregulated gene Mug184                                       | 84.70  | 41.27  | <b>-2.05</b> | 0.012 | 65.03  | <b>-1.30</b> | 0.015 | 117.20 | 158.59 | <b>1.35</b> | 0.038 |
| mug66                                  | meiotically upregulated gene Mug66                                        | 143.83 | 158.70 | 1.10         | 0.016 | 158.70 | 1.10         | 0.019 | 181.76 | 454.43 | <b>2.50</b> | 0.013 |
| MEI5                                   | Meiosis specific protein involved in DMC1-dependent meiotic recombination | 6.67   | 6.67   | 1.00         | 0.015 | 6.67   | 1.00         | 0.030 | 7.58   | 9.48   | <b>1.25</b> | 0.032 |
| REC8                                   | Meiosis-specific component of sister chromatid cohesion complex           | 29.72  | 29.72  | 1.00         | 0.017 | 29.72  | 1.00         | 0.034 | 49.66  | 71.05  | <b>1.43</b> | 0.023 |
| SMA2                                   | Meiosis-specific prospore membrane protein                                | 20.33  | 21.26  | 1.05         | 0.014 | 21.26  | 1.05         | 0.047 | 27.36  | 37.02  | <b>1.35</b> | 0.019 |
| <b>Sporulation and spore formation</b> |                                                                           |        |        |              |       |        |              |       |        |        |             |       |
| mde10 <sup>c</sup>                     | spore wall assembly peptidase Mde10                                       | 596.03 | 746.70 | <b>1.25</b>  | 0.013 | 789.27 | <b>1.32</b>  | 0.025 | 671.15 | 776.10 | <b>1.26</b> | 0.032 |
| meu14                                  | sporulation protein Meu14                                                 | 76.17  | 102.70 | <b>1.35</b>  | 0.024 | 102.70 | <b>1.35</b>  | 0.029 | 86.43  | 115.46 | <b>1.34</b> | 0.052 |
| ADY3                                   | Protein required for spore wall formation                                 | 9.99   | 12.14  | <b>1.21</b>  | 0.016 | 10.68  | <b>1.27</b>  | 0.019 | 11.99  | 14.09  | <b>1.28</b> | 0.021 |

|                                         |                                                                                                       |        |         |             |       |         |             |       |        |         |             |       |
|-----------------------------------------|-------------------------------------------------------------------------------------------------------|--------|---------|-------------|-------|---------|-------------|-------|--------|---------|-------------|-------|
| SPO75                                   | Meiosis-specific protein of unknown function, required for spore wall formation                       | 15.79  | 15.79   | 1.00        | 0.019 | 15.79   | 1.00        | 0.032 | 14.65  | 17.95   | <b>1.23</b> | 0.039 |
| ISC10                                   | Protein required for sporulation, transcript is induced 7.5 hours after induction                     | 13.30  | 13.30   | 1.00        | 0.015 | 13.30   | 1.00        | 0.015 | 12.54  | 15.12   | <b>1.21</b> | 0.020 |
| SSP2                                    | Sporulation specific protein that localizes to the spore wall; required for sporulation               | 8.72   | 9.11    | 1.04        | 0.011 | 9.11    | 1.04        | 0.022 | 9.87   | 11.94   | <b>1.21</b> | 0.025 |
| CRR1                                    | Putative glycoside hydrolase of the spore wall envelope; required for normal sporulation              | 15.18  | 15.18   | 1.00        | 0.020 | 15.49   | 1.02        | 0.013 | 19.46  | 24.15   | <b>1.24</b> | 0.029 |
| <b>Potential agglutination proteins</b> |                                                                                                       |        |         |             |       |         |             |       |        |         |             |       |
| SPBC947.04 <sup>c</sup>                 | cell surface glycoprotein (predicted), DIPSY family, 47.5% homology with <i>S. pombe</i> adhesin Mam3 | 672.03 | 2843.93 | <b>4.23</b> | 0.030 | 1803.99 | <b>2.68</b> | 0.025 | 768.69 | 2624.16 | <b>3.41</b> | 0.027 |
| SPBPJ4664.02                            | cell surface glycoprotein (predicted), 55.1% homologue with <i>S. cerevisiae</i> adhesin FLO11        | 656.27 | 1992.06 | <b>3.04</b> | 0.043 | 1303.66 | <b>1.99</b> | 0.015 | 99.37  | 245.91  | 2.47        | 0.014 |
| SPAC186.01                              | cell surface glycoprotein (predicted), DIPSY family, 53.1% homology with <i>S. pombe</i> adhesin Mam3 | 238.95 | 538.90  | <b>2.26</b> | 0.019 | 624.70  | <b>2.61</b> | 0.032 | 249.55 | 500.35  | <b>2.01</b> | 0.039 |

|             |                                                                                                                                   |         |         |              |       |         |              |       |         |         |              |       |
|-------------|-----------------------------------------------------------------------------------------------------------------------------------|---------|---------|--------------|-------|---------|--------------|-------|---------|---------|--------------|-------|
| Mug2        | cell surface glycoprotein (predicted), DUF1773 family protein 1                                                                   | 141.85  | 224.85  | <b>1.59</b>  | 0.011 | 171.37  | <b>1.21</b>  | 0.018 | 76.99   | 111.07  | <b>1.44</b>  | 0.025 |
| SPCC569.01c | cell surface glycoprotein (predicted), DUF1773 family protein 5 /// cell surface                                                  | 984.54  | 1433.52 | <b>1.46</b>  | 0.043 | 1413.70 | <b>1.44</b>  | 0.020 | 1080.74 | 1561.71 | <b>1.45</b>  | 0.016 |
| SPBC359.04c | cell surface glycoprotein (predicted), DIPSY family, 50.4% homology with <i>S. pombe</i> adhesin Map4                             | 343.03  | 433.63  | <b>1.26</b>  | 0.012 | 454.69  | <b>1.33</b>  | 0.044 | 384.72  | 604.61  | <b>1.57</b>  | 0.041 |
| ecm33       | cell wall protein Ecm33                                                                                                           | 4615.59 | 5854.92 | <b>1.27</b>  | 0.022 | 5468.09 | <b>1.28</b>  | 0.030 | 7788.34 | 8409.62 | 1.08         | 0.048 |
| SPAC977.07c | cell surface glycoprotein (predicted) /// cell surface glycoprotein (predicted), 50.6% homology with <i>S. pombe</i> adhesin Map4 | 116.36  | 148.23  | <b>1.27</b>  | 0.017 | 198.03  | <b>1.70</b>  | 0.040 | 177.89  | 107.05  | <b>-1.66</b> | 0.015 |
| Mam3        | cell agglutination protein Mam3                                                                                                   | 726.13  | 490.05  | <b>-1.48</b> | 0.013 | 404.37  | <b>-1.80</b> | 0.049 | 637.44  | 820.46  | <b>1.29</b>  | 0.030 |
| Map4        | cell surface agglutination protein Map4                                                                                           | 645.40  | 603.04  | -1.07        | 0.017 | 580.32  | -1.11        | 0.034 | 688.65  | 903.50  | <b>1.31</b>  | 0.028 |
| Dan1        | Cell wall mannoprotein with similarity to Tir1p, Tir2p, Tir3p, and Tir4p                                                          | 24.60   | 22.35   | -1.10        | 0.013 | 22.35   | -1.10        | 0.045 | 21.01   | 26.98   | <b>1.28</b>  | 0.026 |
| Dan4        | Cell wall mannoprotein with similarity to Tir1p, Tir2p, Tir3p, and Tir4p                                                          | 27.99   | 27.99   | 1.00         | 0.018 | 26.97   | -1.04        | 0.037 | 33.05   | 48.25   | <b>1.46</b>  | 0.033 |



|       |                                                                           |       |       |      |       |       |      |       |        |        |             |       |
|-------|---------------------------------------------------------------------------|-------|-------|------|-------|-------|------|-------|--------|--------|-------------|-------|
| pau24 | Cell wall mannoprotein with similarity to Tir1p, Tir2p, Tir3p, and Tir4p  | 19.45 | 20.09 | 1.03 | 0.015 | 19.45 | 1.00 | 0.051 | 32.76  | 43.41  | <b>1.33</b> | 0.037 |
| ccw12 | Cell wall mannoprotein, mutants are defective in mating and agglutination | 62.03 | 62.03 | 1.00 | 0.018 | 62.03 | 1.00 | 0.016 | 100.66 | 122.61 | <b>1.22</b> | 0.049 |

<sup>a</sup>: Annotations are from Gene DB (<http://www.genedb.org/genedb/pombe/index.jsp>).

<sup>b</sup>: Bold numbers indicated > 1.2 fold change (P<0.05).

<sup>c</sup>: Changes in transcripts level were confirmed by QPCR.

TABLE S2. PCR primers\* used in this study

| Primer                                         | Sequence                                              |
|------------------------------------------------|-------------------------------------------------------|
| Primers for target gene deletion               |                                                       |
| <i>rpl32-1</i> deletion                        |                                                       |
| RPL32-1D1                                      | 5'-gtgctgtattggttcatatttaataaag-3'                    |
| RPL32-1D2                                      | 5'-gcaagctaaacagatctgtttcgaccgttg-3'                  |
| RPL32-1D3                                      | 5'-cgccatccagtttaaaatttaaaagctattc-3'                 |
| RPL32-1D4                                      | 5'-gttcgtttaataacattgaagctcaag-3'                     |
| <i>rpl32-2</i> deletion                        |                                                       |
| RPL32-2D1                                      | 5'-cagcgagagcggtagtcgcttgac-3'                        |
| RPL32-2D2                                      | 5'-gcaagctaaacagatctttctgtgtgtgggtg-3'                |
| RPL32-2D3                                      | 5'-aaaaatatacaatgtaaccaaggatg-3'                      |
| RPL32-2D4                                      | 5'-cgccatccagtttaaaattagaatcacgacttag-3'              |
| <i>rpl21-2</i> deletion                        |                                                       |
| RPL21-2D1                                      | 5'-tagttctgaaataagcgcaacataa-3'                       |
| RPL21-2D2                                      | 5'-gctaaacagatcttgcgttctctg-3'                        |
| RPL21-2D3                                      | 5'-catccagtttaattttaaaaagaatg-3'                      |
| RPL21-2D4                                      | 5'-ttttgcagccttcacgaatgt-3'                           |
| <i>rpl9-2</i> deletion                         |                                                       |
| RPL9-2D1                                       | 5'-cacttttccatcggtccagaa-3'                           |
| RPL9-2D2                                       | 5'-gctaaacagatctgttgatgtgtt-3'                        |
| RPL9-2D3                                       | 5'-catccagtttaaatgtatcacatgc-3'                       |
| RPL9-2D4                                       | 5'-catcctcgatacattattgtaattttg-3'                     |
| <i>mpg</i> deletion                            |                                                       |
| Mpg-D1                                         | 5'-caatctccagcgtagtcgctgaag-3'                        |
| Mpg-D2                                         | 5'-gctaaacagatctaataagcaathtaatac-3'                  |
| Mpg-D3                                         | 5'-ccatccagtttaagatactacatttaac-3'                    |
| Mpg-D4                                         | 5'-agcaaattaagaaatctcaagaagaag-3'                     |
| <i>fbp</i> deletion                            |                                                       |
| Fbp-D1                                         | 5'-cttgagatcacttaagttagcttacgg-3'                     |
| Fbp-D2                                         | 5'-gctaaacagatctgttcgatcttaatg-3'                     |
| Fbp-D3                                         | 5'-ccatccagtttaaaagaaaattcttt-3'                      |
| Fbp-D4                                         | 5'-cgctattttgtgagttttcgatc-3'                         |
| Primers for gene expression in <i>S. pombe</i> |                                                       |
| RPL32-1 expression                             |                                                       |
| upL32-1                                        | 5'-atcccatatgatggctgcaatcaacattgtc-3' ( <i>Nde</i> I) |
| doL32-1                                        | 5'-gcagggatccctaagegtccaagatgtc-3' ( <i>Bam</i> H I)  |

---

RPL32-2 expression

upL32-2                    5'-atcccatatgatggctgctgtcaatatc-3' (*Nde* I)  
doL32-2                    5'-gcaggatccttactcctgagagcgaatt-3' (*Bam*H I)

## KanMX6 expression

upMX6                    5'-atcccatatgatgggtaaggaaaag-3' (*Nde* I)  
doMX6                    5'-gcaggatccgattagaaaaactcatcgag-3' (*Bam*H I)

---

## Primers for QPCR

*rpl32-1*

SP3201F                    5'-ggctgcaatcaacattgtcaaaaagcg-3'  
SP3201R                    5'-gttcgacatcagagacattgcgaacaag-3'

*rpl32-2*

SP3202F                    5'-ggctgctgtcaatatcatcaagaagcg-3'  
SP3202R                    5'-gctcaacatctgaacgttacggactag-3'

## beta-actin

SPACTF                    5'-ggattcctacgttggtgaagctc-3'  
SPACTR                    5'-gggtcaaaggagcctcaaac-3'

*rpl30-1*

SP3001F                    5'-ctgtggtaccaagaagtctaaaaagagc-3'  
SP3001R                    5'-cagcgtaatggtgaacattgcc-3'

*rpl30-2*

SP3002F                    5'-gctgcacctaccactgcacc-3'  
SP3002R                    5'-ctgtagtgggttacagagcagcg-3'

*rps10-1*

SP1001F                    5'-gcaaagctattcatcaagccctttttc-3'  
SP1001R                    5'-ggtaaccagcatcagcagaagc-3'

*rps10-2*

SP1002F                    5'-ggccattcatcaagctttgtcc-3'  
SP1002R                    5'-ccagatcagcagcagagc-3'

---

Primers for gene expression in *E. coli*

## RPL32-2 expression

upL32-2                    5'-cagtgaattcatggctgctgtcaatc-3' (*Eco*R I)  
doL32-2                    5'-gcagctcaggttactcctgagagcgaatt-3' (*Xho* I)

---

## Primers for determination of haploid and diploid yeast cells

MT1                    5'-agaagagagagtagttgaag-3'  
MP                    5'-acgtagtcatcggcttcc-3'  
MM                    5'-tacgttcagtatacgtagtg-3'

---

\*, all the oligonucleotide primers were synthesized by Sangon Corporation (Shanghai, China).
